# Supplementary material
Source: publisher site journal article supplement (https://www.dovepress.com/article/407019)

## Electronic supplementary material: Validation of register-based diabetes classifiers in Danish data

### S1: Codes used in register data

| S1: Codes used in diabetes classifiers (including subcodes):                                                                                                                                                                                         |                                                                 |                                                                                      |                                                 |
|------------------------------------------------------------------------------------------------------------------------------------------------------------------------------------------------------------------------------------------------------|-----------------------------------------------------------------|--------------------------------------------------------------------------------------|-------------------------------------------------|
| Hospital diagnoses:<br>ICD-10 codes                                                                                                                                                                                                                  | Prescription purchases:<br>ATC codes                            | HbA1c samples:<br>NPU codes                                                          | Health service codes:<br>SPEC2 codes            |
| Diabetes:<br>E10-E14                                                                                                                                                                                                                                 | Glucose-lowering drugs:<br>A10                                  | HbA1c (IFCC):<br>NPU27300                                                            | Diabetes-specific<br>podiatrist services:<br>54 |
| Type 1 diabetes: E10                                                                                                                                                                                                                                 | Insulins (including<br>insulin analogues):<br>A10A              | HbA1c (DCCT):<br>NPU03835<br>(samples also reported<br>as NPU27300 were<br>excluded) |                                                 |
| Type 2 diabetes: E11                                                                                                                                                                                                                                 | Non-insulin glucose-<br>lowering drugs: A10B                    |                                                                                      |                                                 |
| Polycystic Ovary<br>Syndrome: E282                                                                                                                                                                                                                   | Clomifene: G03GB02<br><br>Antiandrogens and<br>estrogens: G03HB |                                                                                      |                                                 |
| Gestational diabetes<br>mellitus: O244                                                                                                                                                                                                               |                                                                 |                                                                                      |                                                 |
| Pregnancy endings:<br>DO00 – DO06, DO80 -<br>DO84, DZ33, DZ37<br>(pregnancies are<br>defined as non-<br>overlapping windows<br>spanning 40 weeks<br>before a registration to<br>12 weeks after)                                                      |                                                                 |                                                                                      |                                                 |
| Maternal care: DO07,<br>DO10 - DO49, DZ32,<br>DZ34 – 36<br>(pregnancy windows are<br>defined by maternal<br>care codes only if no<br>pregnancy ending is<br>registered between 12<br>weeks before the<br>maternal care record<br>and 40 weeks after) |                                                                 |                                                                                      |                                                 |

## **S2: Detailed OSDC flow-charts**

See the following two pages.

*Flowchart of inclusion into study population:*

Numbers indicate individuals in the source data and the register-classified diabetes population. For each type of inclusion event, this corresponds to any individual with at least one event of the respective type of inclusion criteria. For censored events, this corresponds to any individual with at least one censored event due to the respective type of censoring.

*Flowchart of inclusion into study population: Diabetes type*

Numbers indicate individuals classified as type 1 diabetes or type 2 diabetes across each step of the algorithm. Note that due to the source data on prescription purchases and hospital diagnoses being restricted to December 31 2018 and earlier, only individuals with register-classified type 2 diabetes were excluded due to onset after the index date.

# Flowchart of inclusion into study population

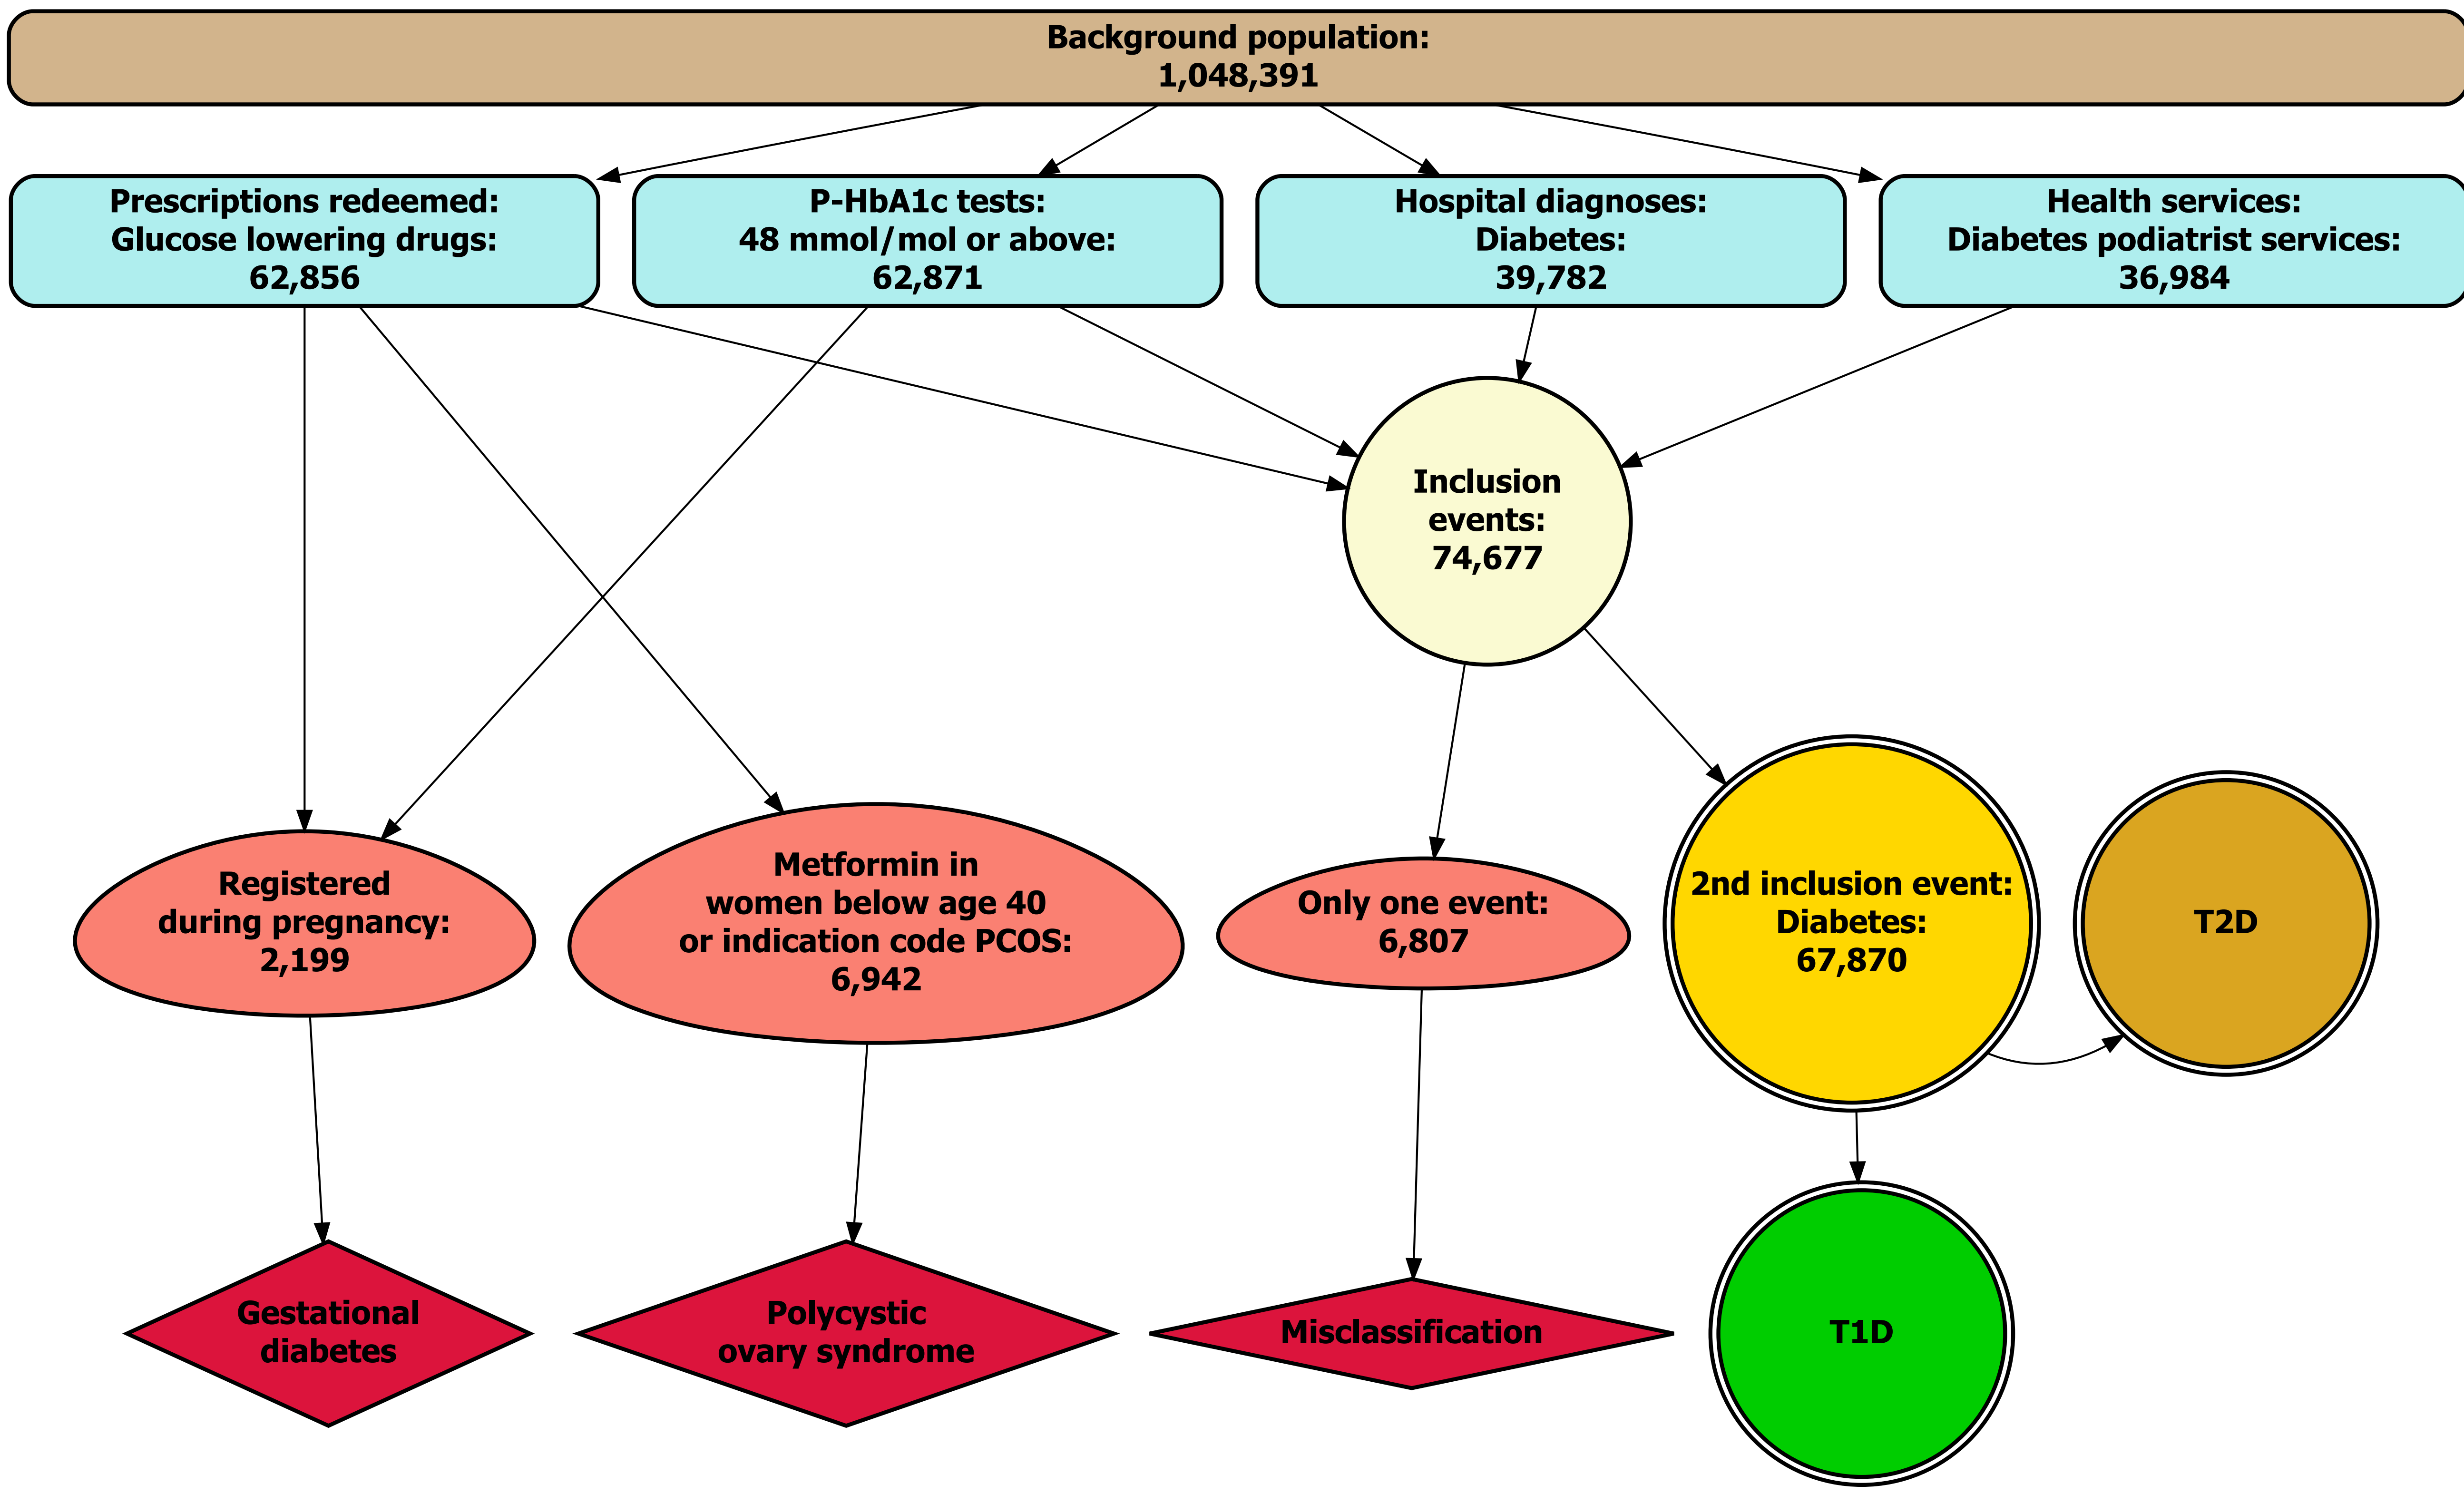

Flowchart of inclusion into study population: Diabetes type

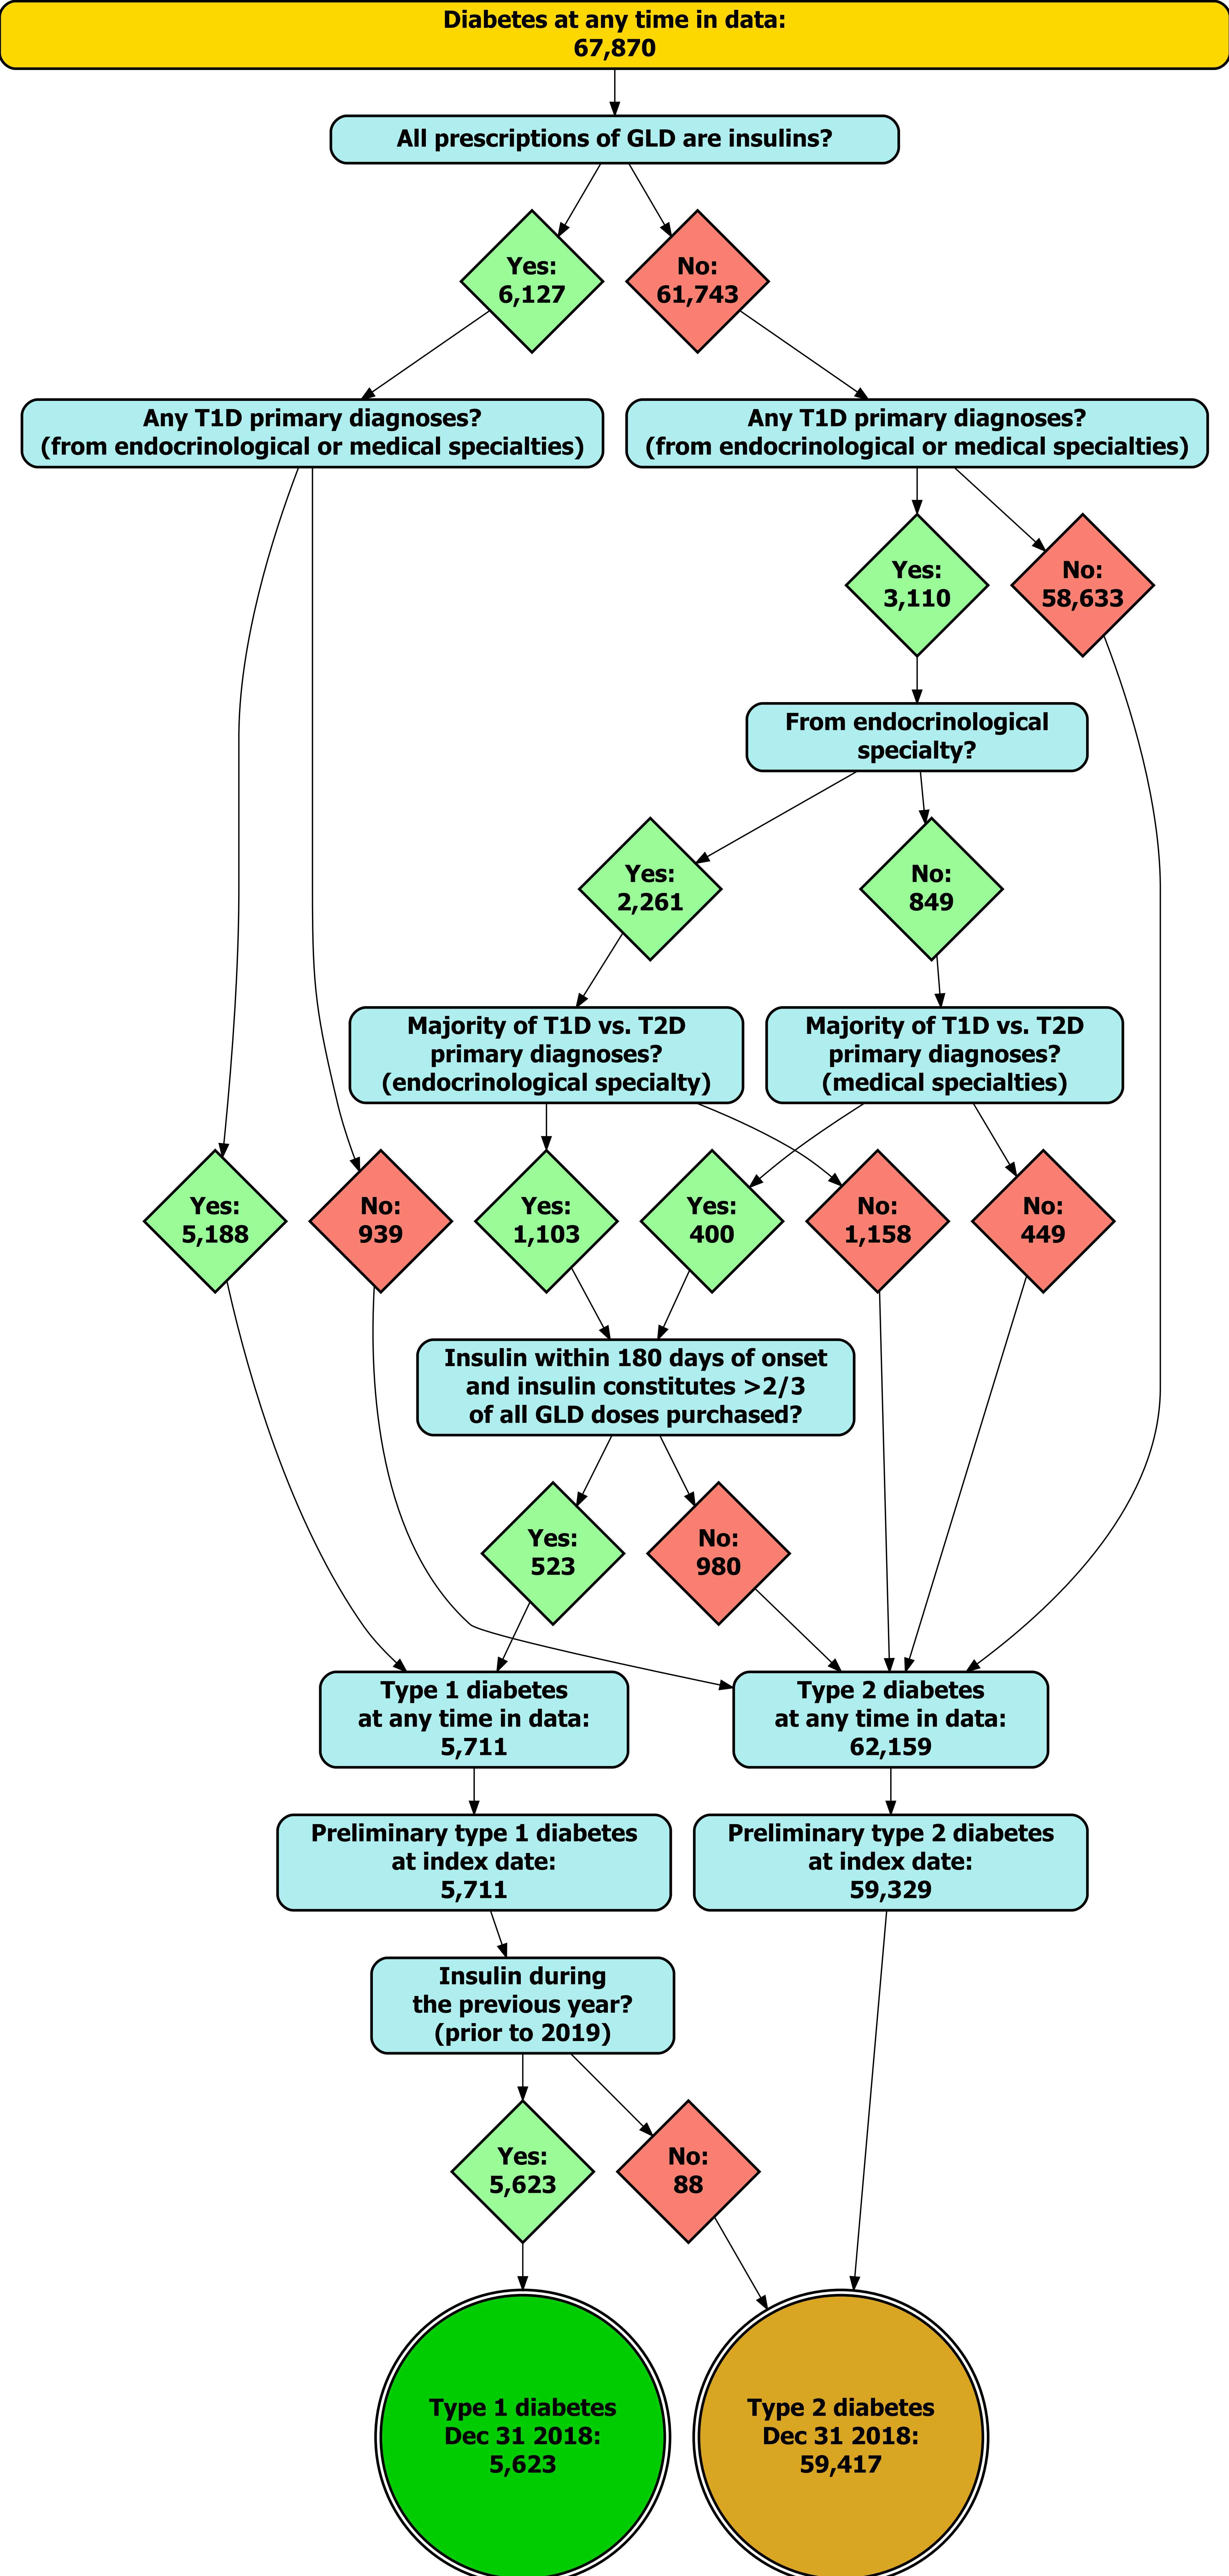

**S3: Bootstrapped main analyses**

Computed means and 95% confidence intervals for each diabetes type, classifiers and validation metric in 1000 bootstrap samples

|                        | Sensitivity             | Specificity             | PPV                     | NPV                     |
|------------------------|-------------------------|-------------------------|-------------------------|-------------------------|
| <b>Type 1 diabetes</b> |                         |                         |                         |                         |
| OSDC                   | 0.774<br>(0.739; 0.809) | 0.999<br>(0.999; 1.000) | 0.951<br>(0.929; 0.972) | 0.997<br>(0.996; 0.997) |
| RSCD                   | 0.702<br>(0.661; 0.740) | 0.999<br>(0.999; 1.000) | 0.952<br>(0.930; 0.973) | 0.996<br>(0.995; 0.996) |
| <b>Type 2 diabetes</b> |                         |                         |                         |                         |
| OSDC                   | 0.943<br>(0.940; 0.946) | 0.989<br>(0.988; 0.990) | 0.878<br>(0.866; 0.889) | 0.995<br>(0.995; 0.996) |
| RSCD                   | 0.899<br>(0.891; 0.908) | 0.992<br>(0.991; 0.993) | 0.899<br>(0.888; 0.910) | 0.992<br>(0.991; 0.992) |

**S4: Health in Central Denmark respondent characteristics without downsampling:**

| <b>Supplementary 4: Characteristics of diabetes cohorts by diabetes status without downsampling</b> |              | <b>T1D</b>       | <b>T2D</b>       | <b>No diabetes</b> |
|-----------------------------------------------------------------------------------------------------|--------------|------------------|------------------|--------------------|
| <b>Self-reported diabetes cohort</b>                                                                |              |                  |                  |                    |
| Diabetes type (self-reported)                                                                       | N (%)        | 3,241<br>(6.8)   | 16,024<br>(33.8) | 28,085<br>(59.3)   |
| Age at onset (self-reported)                                                                        | Mean (SD)    | 26.6<br>(16.2)   | 51.4<br>(11.5)   |                    |
| Sex: Female                                                                                         | N (%)        | 1,449<br>(44.7)  | 6,328<br>(39.5)  | 12,463<br>(44.4)   |
| Age                                                                                                 | Mean (SD)    | 50.2<br>(14.9)   | 61.9<br>(9.3)    | 59.9 (11.4)        |
| Migrant origin                                                                                      | N (%)        | 151<br>(4.7)     | 1,135<br>(7.1)   | 1,324 (4.7)        |
| <b>OSDC-classified diabetes cohort</b>                                                              |              |                  |                  |                    |
| Diabetes type (OSDC-classified)                                                                     | 2,674 (5.6)  | 18,018<br>(38.1) | 26,658<br>(56.3) | 2,674 (5.6)        |
| Age at onset (OSDC-classified)                                                                      | 30.4 (13.1)  | 53.4<br>(10.2)   |                  | 30.4 (13.1)        |
| Sex: Female                                                                                         | 1,218 (45.5) | 7,395<br>(41.0)  | 11,627<br>(43.6) | 1,218 (45.5)       |
| Age                                                                                                 | 48.6 (15.1)  | 61.5<br>(9.6)    | 60.0<br>(11.4)   | 48.6 (15.1)        |
| Migrant origin                                                                                      | 83 (3.1)     | 1,338<br>(7.4)   | 1,189<br>(4.5)   | 83 (3.1)           |
| <b>RSCD-classified diabetes cohort</b>                                                              |              |                  |                  |                    |
| Diabetes type (RSCD-classified)                                                                     | N (%)        | 2,419<br>(5.1)   | 16,647<br>(35.2) | 28,284<br>(59.7)   |
| Age at onset (RSCD-classified)                                                                      | Mean (SD)    | 28.5<br>(13.2)   | 52.5<br>(10.7)   |                    |
| Sex: Female                                                                                         | N (%)        | 1,076<br>(44.5)  | 6,688<br>(40.2)  | 12,476<br>(44.1)   |
| Age                                                                                                 | Mean (SD)    | 48.0<br>(15.3)   | 61.4<br>(9.6)    | 60.1 (11.4)        |
| Migrant origin                                                                                      | N (%)        | 80 (3.3)         | 1,222<br>(7.3)   | 1,308 (4.6)        |

# S5: Validation analyses of T1D stratified by sex

| Supplementary 5: Analyses of T1D stratified by sex |                            |                            |         |                           |
|----------------------------------------------------|----------------------------|----------------------------|---------|---------------------------|
| Men                                                |                            |                            |         |                           |
| OSDC                                               | Survey: +T1D               | Survey: -T1D               | Total N |                           |
| OSDC: +T1D                                         | 163                        | 11                         | 174     | PPV: 0.937 (0.890, 0.968) |
| OSDC: -T1D                                         | 65                         | 16,386                     | 16,451  | NPV: 0.996 (0.995, 0.997) |
| Total N                                            | 228                        | 16,397                     | 16,625  |                           |
|                                                    | Sens: 0.715 (0.652, 0.773) | Spec: 0.999 (0.999, 1.000) |         |                           |
| Women                                              |                            |                            |         |                           |
| OSDC                                               | Survey: +T1D               | Survey: -T1D               | Total N |                           |
| OSDC: +T1D                                         | 154                        | 8                          | 162     | PPV: 0.951 (0.905, 0.978) |
| OSDC: -T1D                                         | 28                         | 12,576                     | 12,604  | NPV: 0.998 (0.997, 0.999) |
| Total N                                            | 182                        | 12,584                     | 12,766  |                           |
|                                                    | Sens: 0.846 (0.785, 0.895) | Spec: 0.999 (0.999, 1.000) |         |                           |
| Men                                                |                            |                            |         |                           |
| RSCD                                               | Survey: +T1D               | Survey: -T1D               | Total N |                           |
| RSCD: +T1D                                         | 155                        | 10                         | 165     | PPV: 0.939 (0.891, 0.971) |
| RSCD: -T1D                                         | 73                         | 16,387                     | 16,460  | NPV: 0.996 (0.994, 0.997) |
| Total N                                            | 228                        | 16,397                     | 16,625  |                           |
|                                                    | Sens: 0.680 (0.615, 0.740) | Spec: 0.999 (0.999, 1.000) |         |                           |
| Women                                              |                            |                            |         |                           |
| RSCD                                               | Survey: +T1D               | Survey: -T1D               | Total N |                           |
| RSCD: +T1D                                         | 132                        | 7                          | 139     | PPV: 0.950 (0.899, 0.980) |
| RSCD: -T1D                                         | 50                         | 12,577                     | 12,627  | NPV: 0.996 (0.995, 0.997) |
| Total N                                            | 182                        | 12,584                     | 12,766  |                           |
|                                                    | Sens: 0.725 (0.654, 0.789) | Spec: 0.999 (0.999, 1.000) |         |                           |

# S6: Validation analyses of T1D stratified by sex

| Supplementary 6: Analyses of T2D stratified by sex |                            |                            |         |                           |
|----------------------------------------------------|----------------------------|----------------------------|---------|---------------------------|
| Men                                                |                            |                            |         |                           |
| OSDC                                               | Survey: +T2D               | Survey: -T2D               | Total N |                           |
| OSDC: +T2D                                         | 1,264                      | 156                        | 1,420   | PPV: 0.890 (0.873, 0.906) |
| OSDC: -T2D                                         | 74                         | 15,131                     | 15,205  | NPV: 0.995 (0.994, 0.996) |
| Total N                                            | 1,338                      | 15,287                     | 16,625  |                           |
|                                                    | Sens: 0.945 (0.931, 0.956) | Spec: 0.990 (0.988, 0.991) |         |                           |
| RSCD                                               |                            |                            |         |                           |
| RSCD                                               | Survey: +T2D               | Survey: -T2D               | Total N |                           |
| RSCD: +T2D                                         | 1,223                      | 108                        | 1,331   | PPV: 0.919 (0.903, 0.933) |
| RSCD: -T2D                                         | 115                        | 15,179                     | 15,294  | NPV: 0.992 (0.991, 0.994) |
| Total N                                            | 1,338                      | 15,287                     | 16,625  |                           |
|                                                    | Sens: 0.914 (0.898, 0.929) | Spec: 0.993 (0.991, 0.994) |         |                           |
| Women                                              |                            |                            |         |                           |
| OSDC                                               | Survey: +T2D               | Survey: -T2D               | Total N |                           |
| OSDC: +T2D                                         | 834                        | 143                        | 977     | PPV: 0.854 (0.830, 0.875) |
| OSDC: -T2D                                         | 51                         | 11,738                     | 11,789  | NPV: 0.996 (0.994, 0.997) |
| Total N                                            | 885                        | 11,881                     | 12,766  |                           |
|                                                    | Sens: 0.942 (0.925, 0.957) | Spec: 0.988 (0.986, 0.990) |         |                           |
| RSCD                                               |                            |                            |         |                           |
| RSCD                                               | Survey: +T2D               | Survey: -T2D               | Total N |                           |
| RSCD: +T2D                                         | 788                        | 121                        | 909     | PPV: 0.867 (0.843, 0.888) |
| RSCD: -T2D                                         | 97                         | 11,760                     | 11,857  | NPV: 0.992 (0.990, 0.993) |
| Total N                                            | 885                        | 11,881                     | 12,766  |                           |
|                                                    | Sens: 0.890 (0.868, 0.910) | Spec: 0.990 (0.988, 0.992) |         |                           |



**Supplementary 7: Bias between self-reported and register-classified diabetes duration across calendar year of diabetes onset:**

See the following four pages of plots for each diabetes type and register-based classifier.

Number of individuals within each hexagon is denoted by its color. A smoothed loess regression line with 95% confidence intervals as shades is plotted in red. To comply with statistical disclosure requirements to protect individual-level data privacy, analyses were performed in the survey respondent population without subsampling.

# Diabetes duration: T1D in OSDC

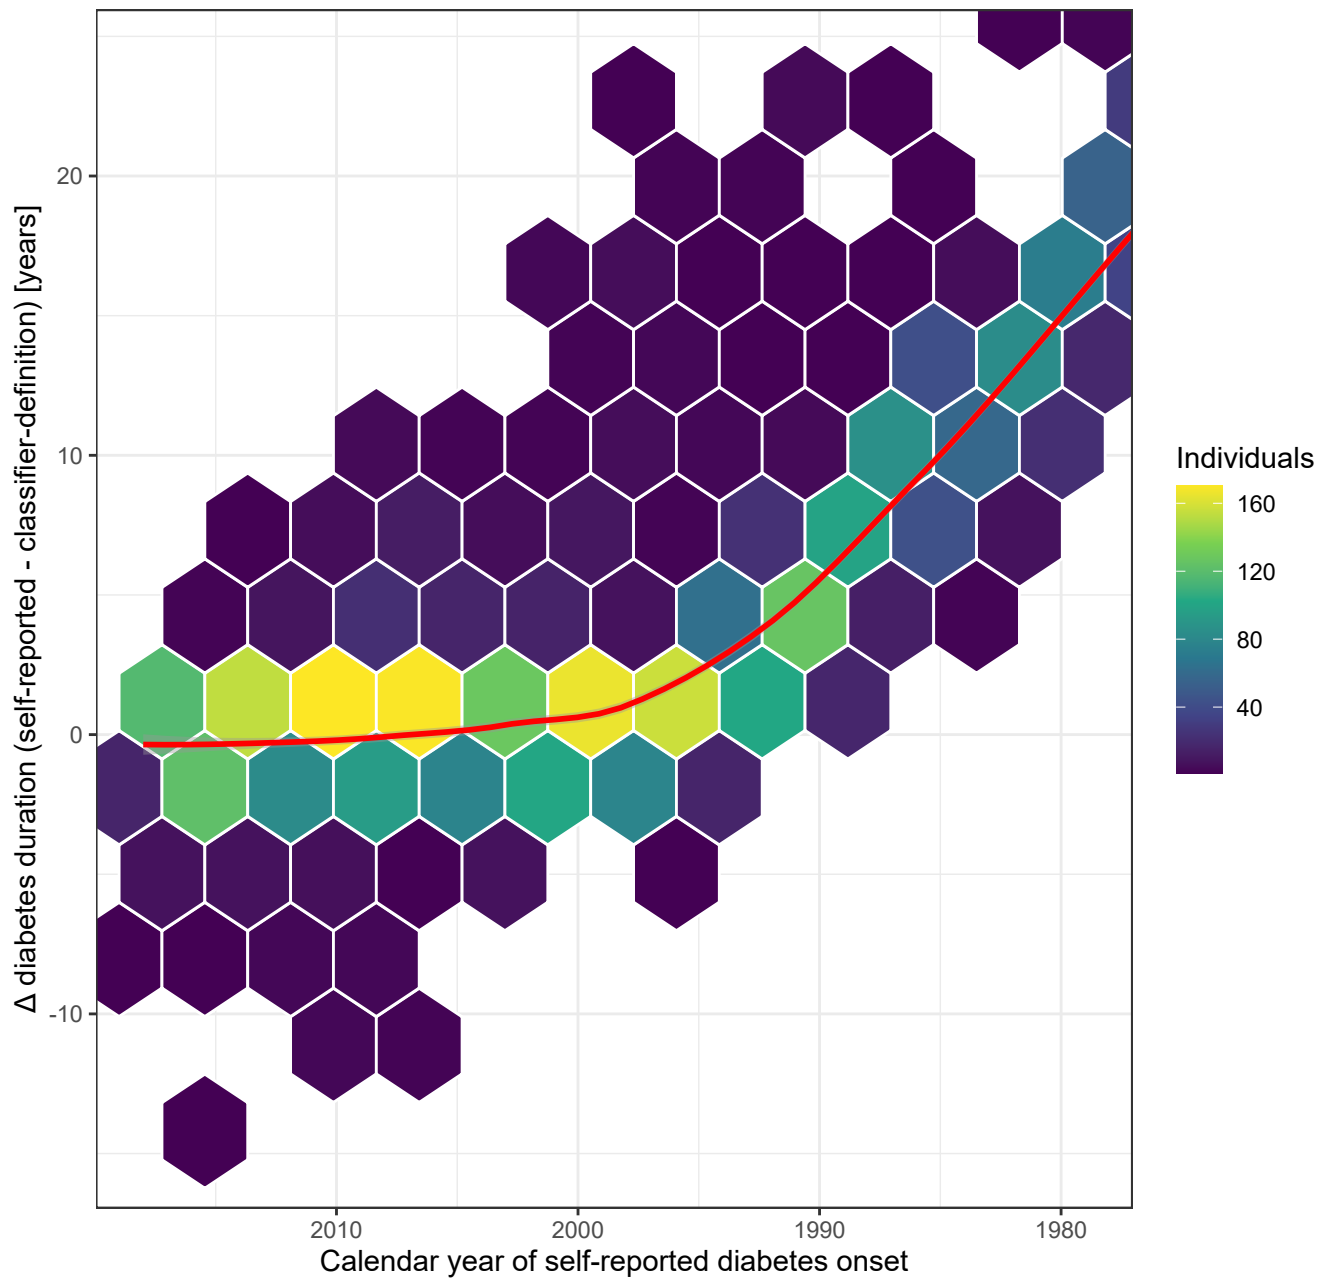

Diabetes duration: T1D in RSCD

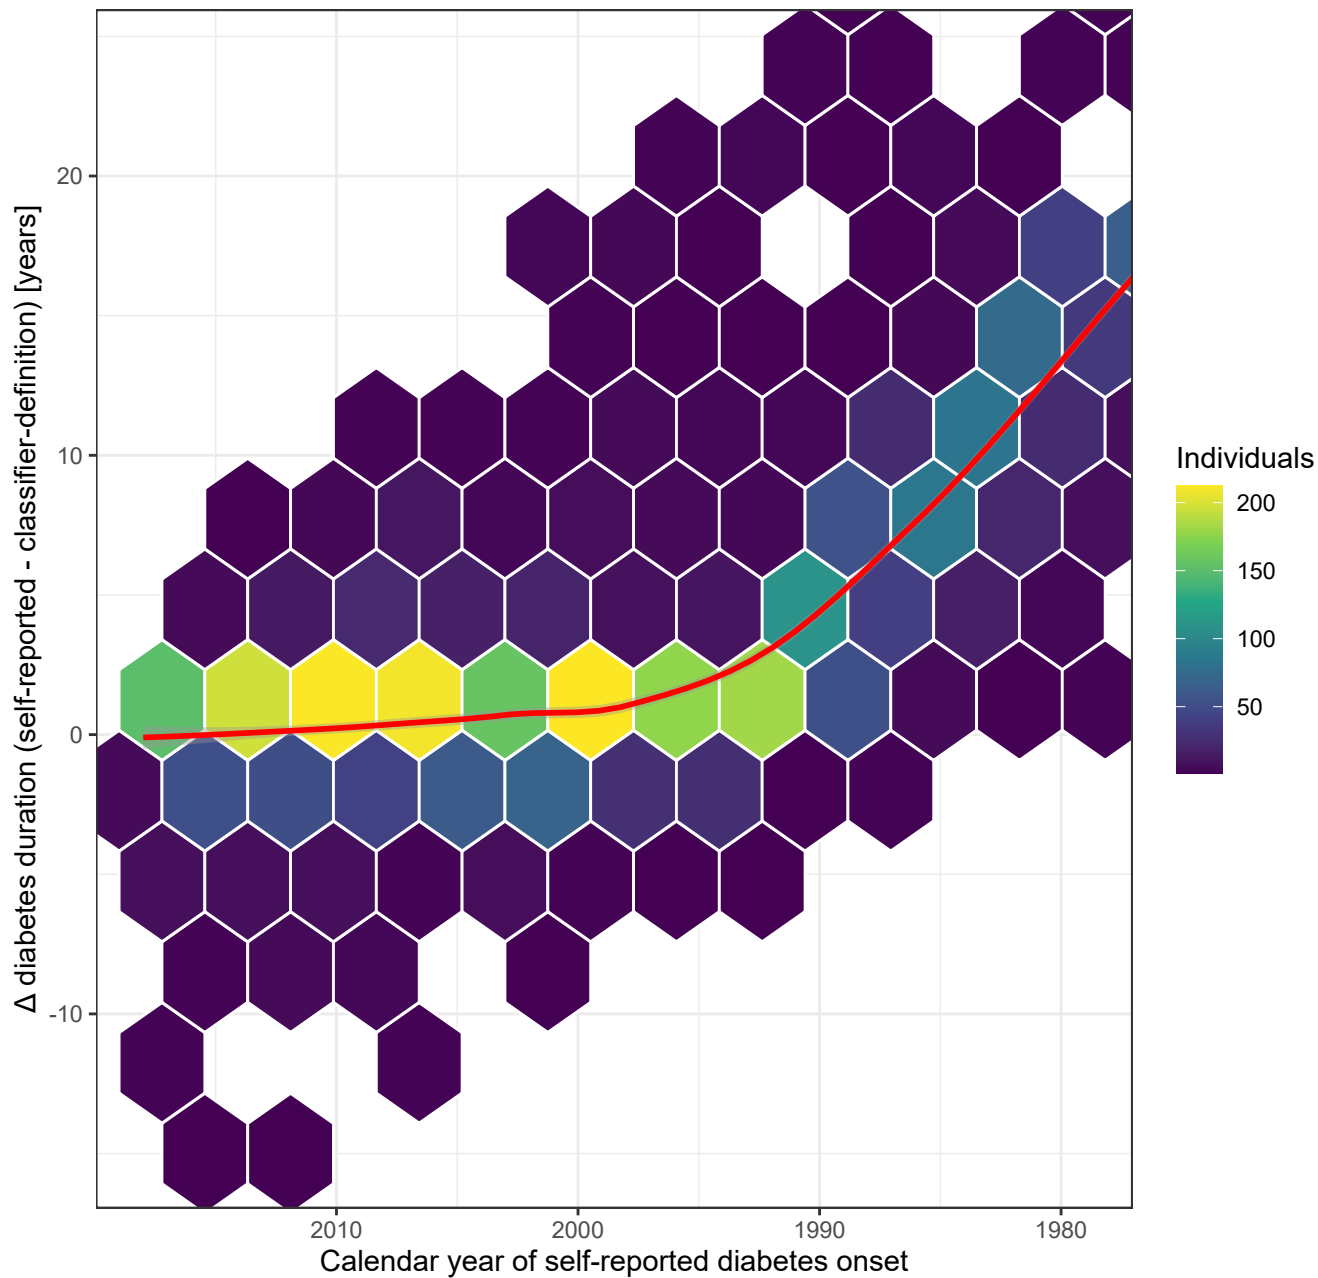

Diabetes duration: T2D in OSDC

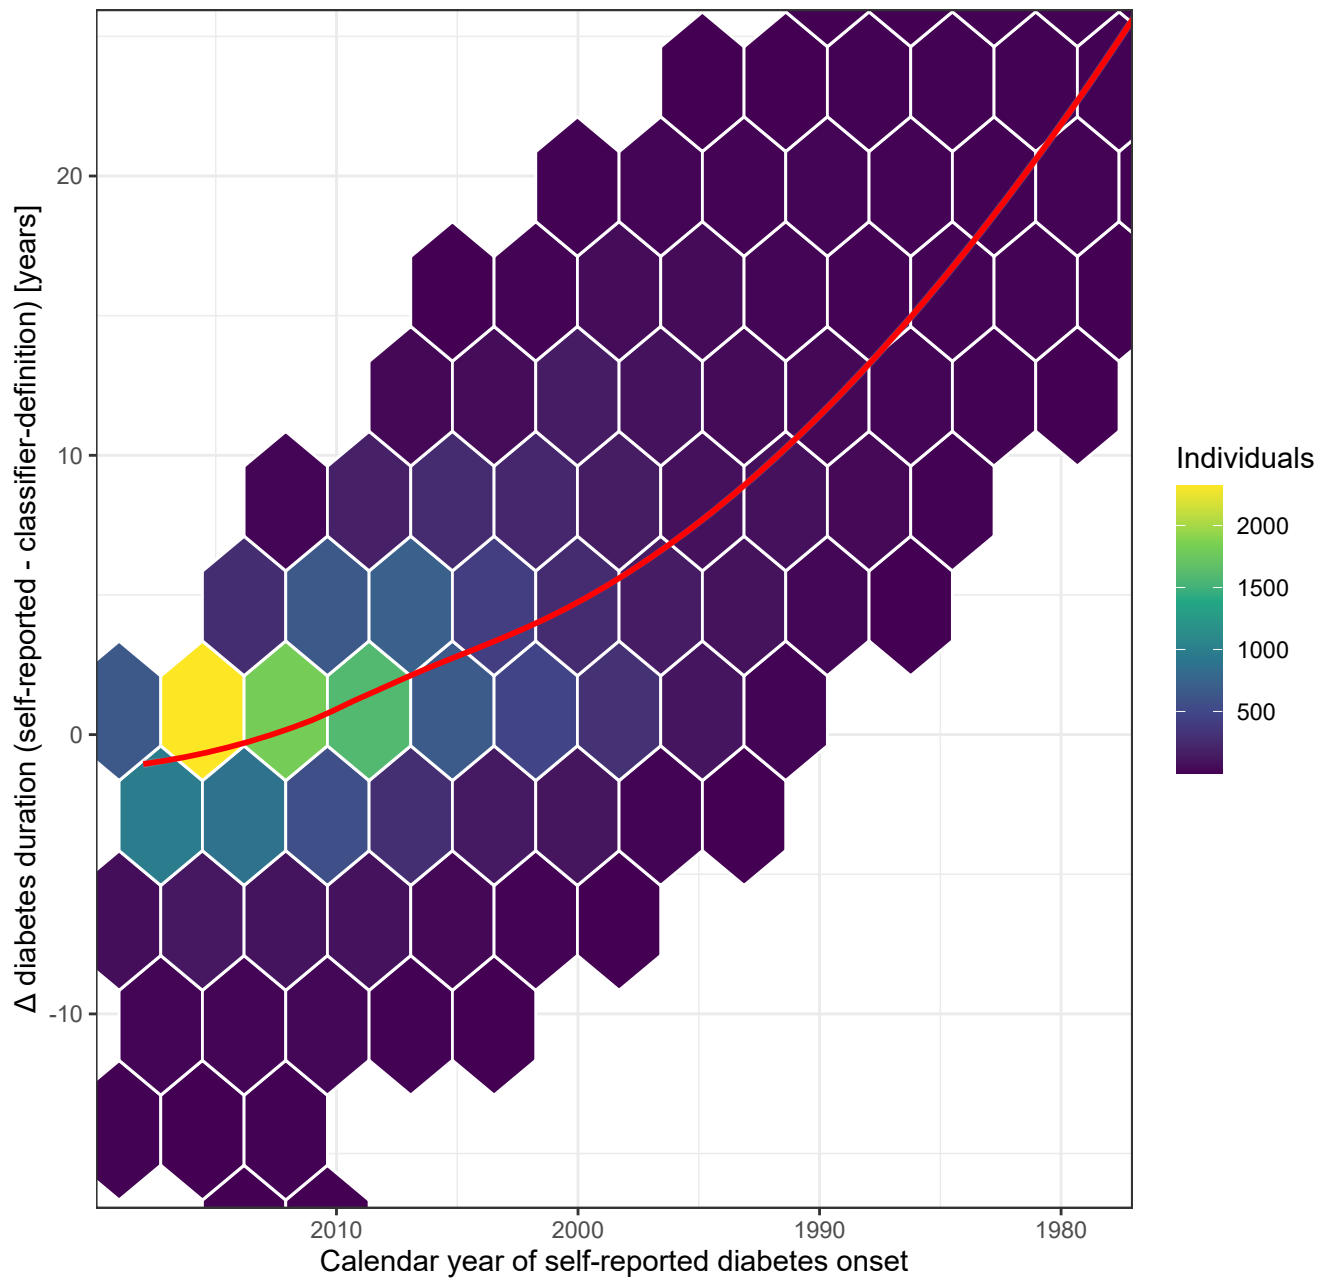

Diabetes duration: T2D in RSCD

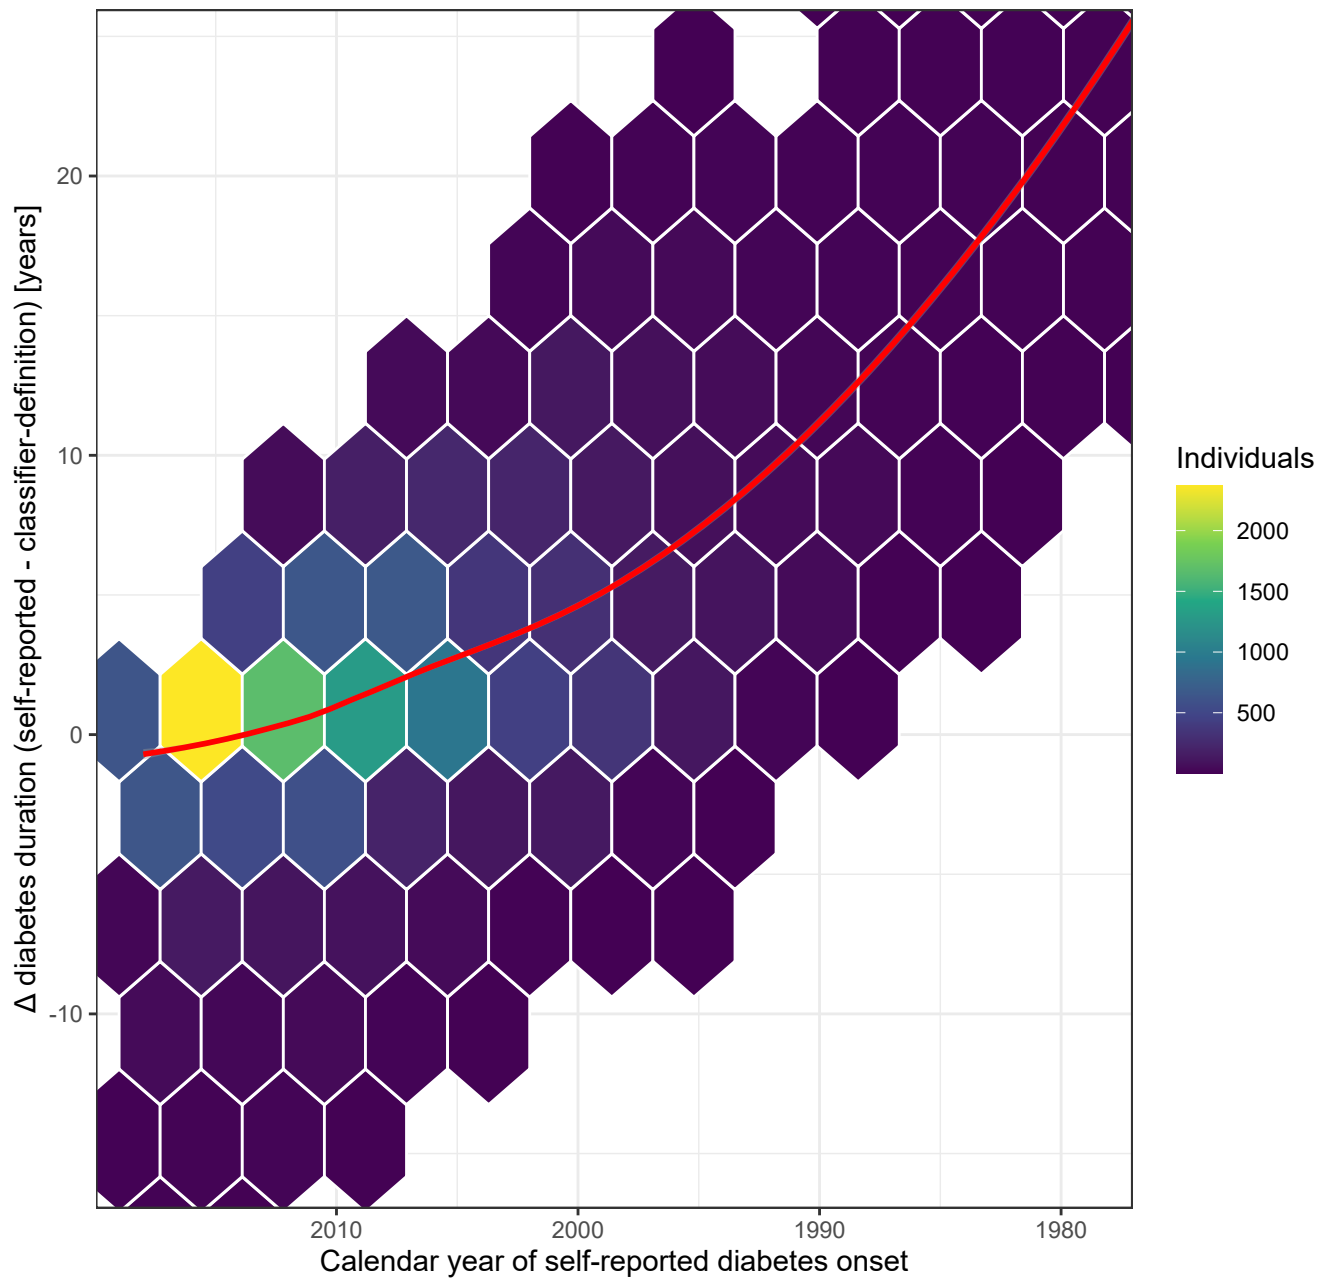

Supplement: Supplementary file 1 [file get_supplementary_file.php]
